# Supplementary material
Source: publisher figshare collection journal article supplement (https://springernature.figshare.com/ndownloader/files/30601581)
Supplement: Supplementary file [file 30601581]

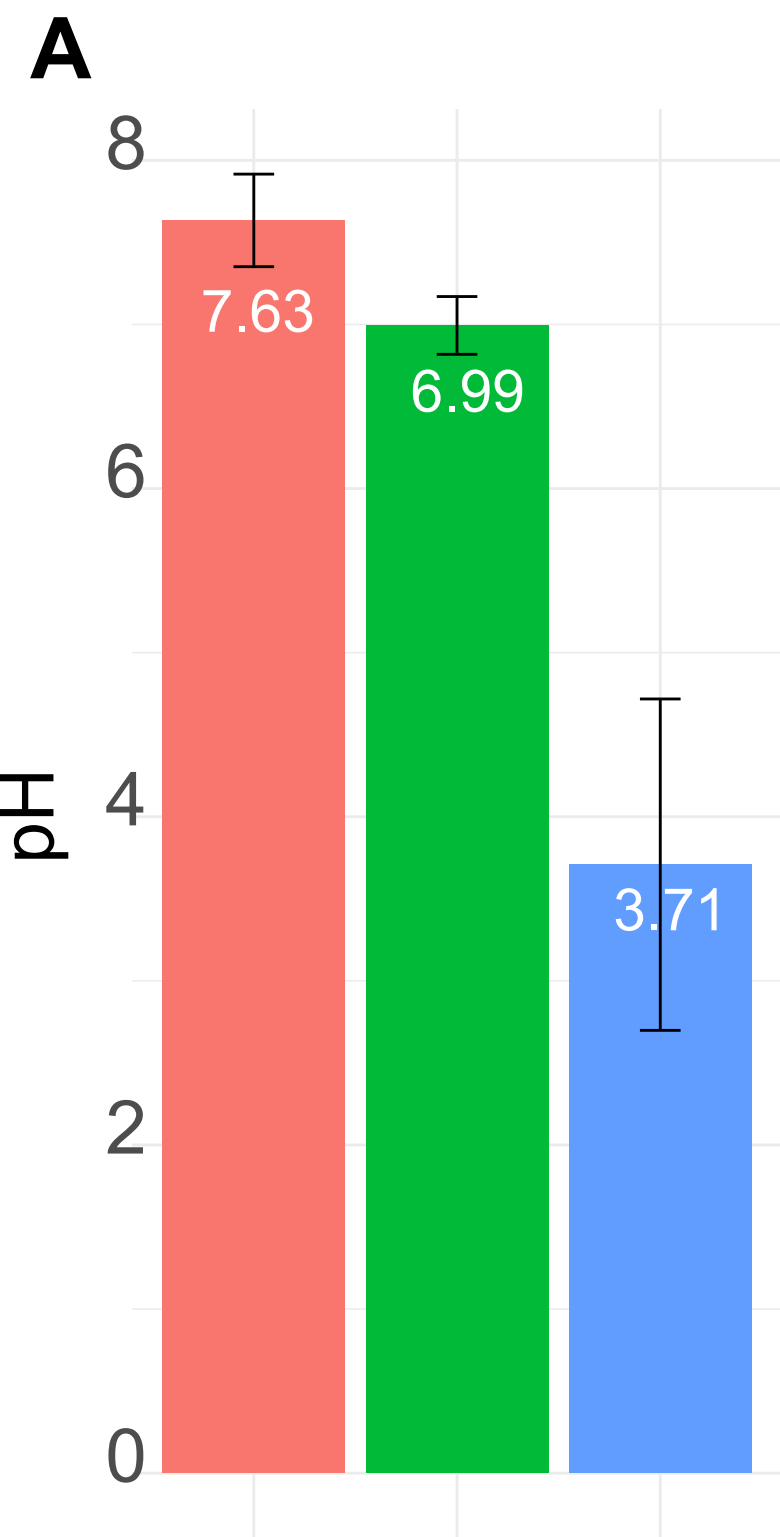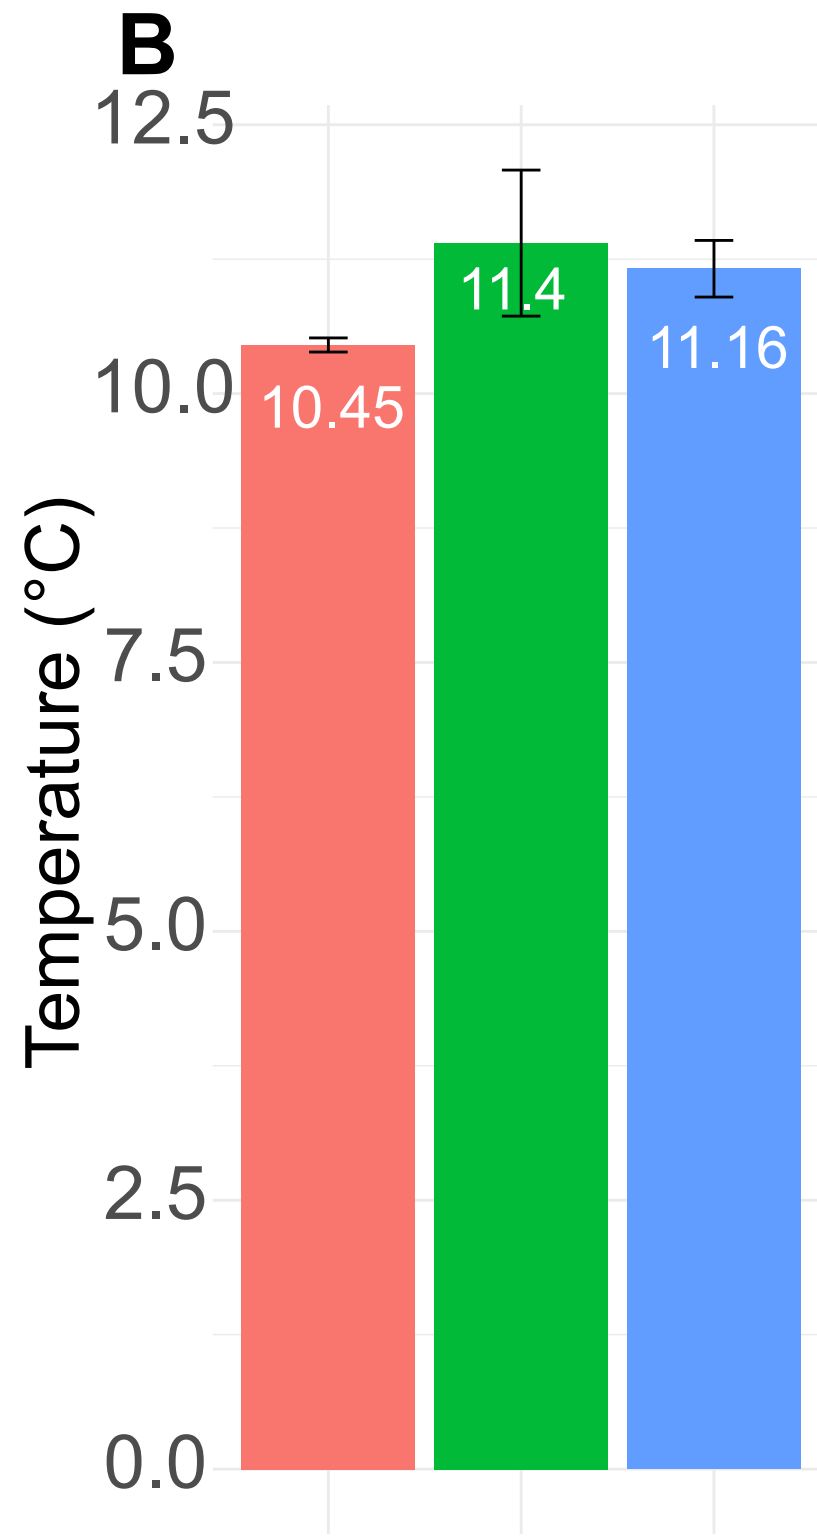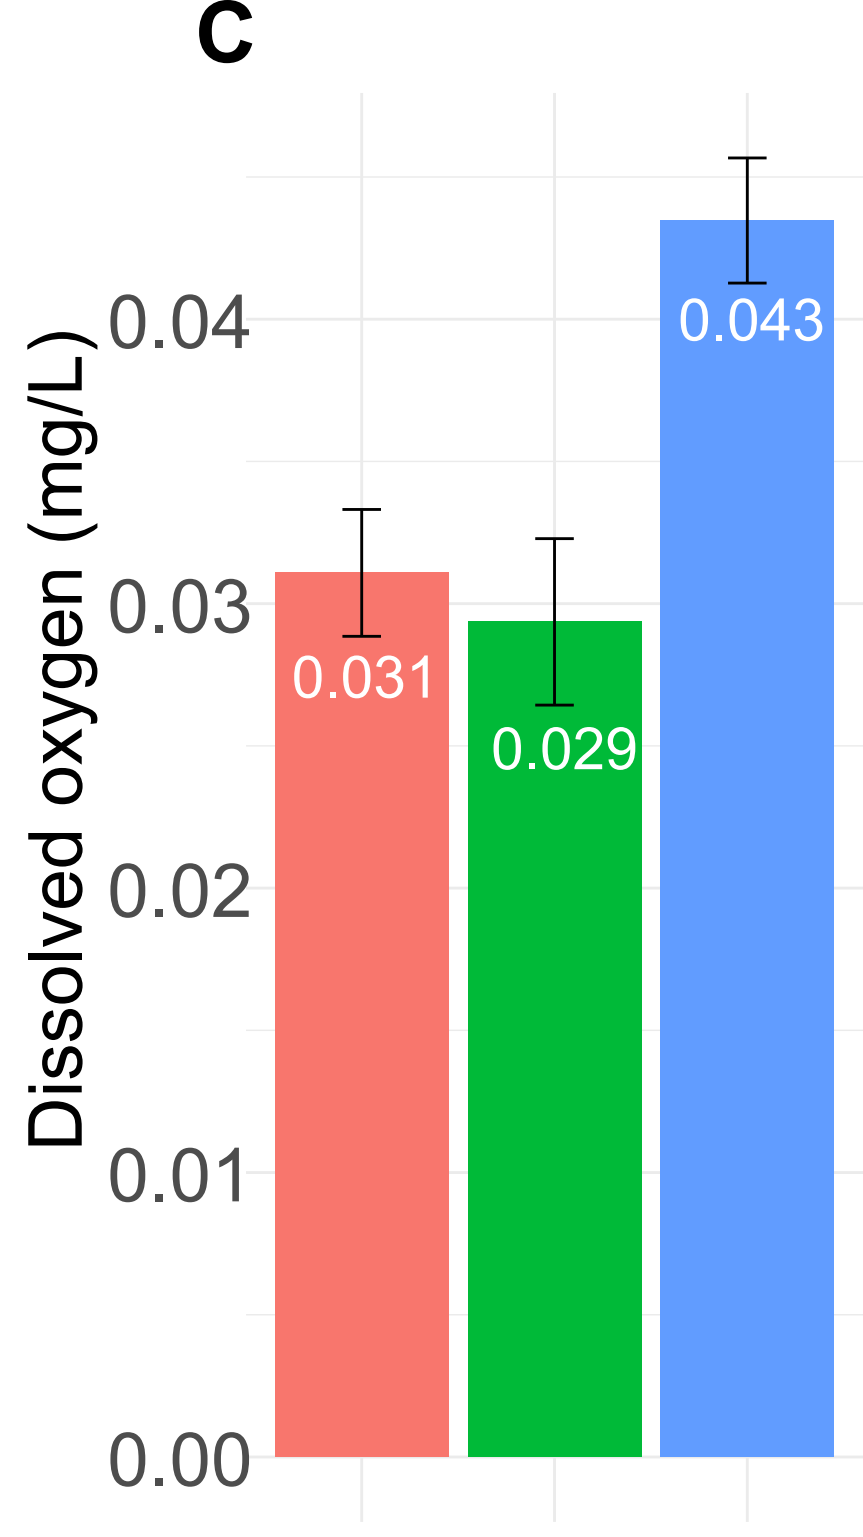

Compartment    Mid gut    Pyloric Caeca    Stomach
